# Supplementary material for: Defining signatures of peripheral T-cell lymphoma with a targeted 20-marker gene expression profiling assay
Source: PubMed Central journal article supplement — Haematologica. 2019 Sep 5;105(6):1582–92. doi: 10.3324/haematol.2019.226647 (PMC7271600; doi:10.3324/haematol.2019.226647), 2020-06
Supplement: 2019_226647-Disclosures_and_Contributions.pdf [file 2019_226647-Disclosures_and_Contributions.pdf]

Haematologica  
HAEMATOL/2019/226647  
Version 3

Defining the signatures of peripheral T-cell lymphoma, with a targeted  
20-markers gene expression profiling assay (RT-MLPA)

Fanny Drieux, Philippe Ruminy, Ahmad Abdel-Sater, François  
Lemonnier, Pierre-Julien Vially, Virginie Fataccioli, Vinciane Machand,  
Bettina Bisig, Audrey Letourneau, Marie Parrens, Céline Bossard, Julie  
Bruneau, Pamela Dobay, Liana Veresezan, Aurélie Dupuy, Anaïs  
Pujals, Cyrielle Robe, Nouhoum Sako, Christiane Copie-Bergman,  
Marie-Helene Delfau-Larue, Jean-Michel Picquenot, Hervé Tilly,  
Richard Delarue, Fabrice Jardin, Laurence de Leval, and Philippe  
Gaulard

Collaborative Groups: TENOMIC (Philippe Gaulard)

Disclosures: The authors have no conflict of interest to disclose. This work was supported in part by institutional grants from the Institut National du Cancer (INCA), the Fondation pour la Recherche Médicale (FRM, Equipe Labellisée DEQ20160334875), the Leukemia Lymphoma Society (LLS), the Fondation Force Hémato and the Institut Carnot (CALYM), MEDIC Foundation.

Contributions: F. Drieux, P. Ruminy, F. Jardin, L. de Leval and P. Gaulard designed the study. F. Drieux, P. Ruminy, F. Jardin developed the RT-MLPA methodologies. A. Abdel-Sater, F. Lemonnier, P-J Vially, V. Fataccioli, V. Marchand, B. Bisig, A. Letourneau, M. Parrens, C. Bossard, J. Bruneau, P. Dobay, L. Veresezan, A. Dupuy, A. Pujals, C. Robe, N. Sako, C. Copie-Bergman, M-H Delfau-Larue, J-M Picquenot, H. Tilly, R. Delarue, F. Jardin acquired the data. A. Abdel-Sater, F. Lemonnier, P-J Vially, P. Ruminy, A. Dupuy, L. de Leval, P. Gaulard analysed and interpreted the data. F. Drieux conducted the study and wrote the manuscript. P. Ruminy, L. de Leval and P. Gaulard supervised the study and wrote the manuscript. All authors have read and agreed with the manuscript's content.
